# Supplementary material for: Drought Stress Pre-Treatment Triggers Thermotolerance Acquisition in Durum Wheat
Source: MDPI journal article supplement (doi:10.3390/ijms23147988), 2022-07-20
Supplement: s1 [file s1]

Supplementary Materials

**Table S1.** Two-way ANOVA REPORT for CMS measured in ten wheat cultivars in response to different treatments.

| Source of variation | Sum of square | df  | Mean Square | F     | p-value  |     |
|---------------------|---------------|-----|-------------|-------|----------|-----|
| Cultivar            | 12325.7       | 9   | 1369.5      | 29.7  | 1.3E-36  | *** |
| Treatment           | 19922.8       | 4   | 4980.7      | 108.0 | 1.49E-56 | *** |
| Interaction         | 31349.9       | 36  | 870.8       | 18.9  | 3.56E-57 | *** |
| Res. error          | 13605.9       | 295 | 46.1        |       |          |     |
| Total               | 77095.7       | 344 | 224.1       |       |          |     |

**Table S2** Thermotolerance of ten *T. durum* cvs evaluated using the CMS test. Mean values represent the CMS (%) values determined as: constitutive thermotolerance (ThC); acquired thermotolerance after a treatment at 34°C for 24 hours (ThA\_34); after heat shock at 40°C for 2 hours (ThA\_40); after drought stress for 2 hours (ThA\_D). The results are shown as the mean  $\pm$  SD of ten independent measurements. For each treatment, values marked with different letters indicate a significant difference among cultivars at  $p < 0.05$  (ANOVA with post-hoc Bonferroni-Holm test).

|           | ThC         |        | ThA_34      |        | ThA_40      |        | ThA_D       |       |
|-----------|-------------|--------|-------------|--------|-------------|--------|-------------|-------|
|           | Mean        | SD     | Mean        | SD     | Mean        | SD     | Mean        | SD    |
| Ardente   | 13.38 $\pm$ | 2.4 e  | 66.83 $\pm$ | 4.2 ab | 45.10 $\pm$ | 2.9 c  | 24.51 $\pm$ | 3.7 c |
| Cappelli  | 35.76 $\pm$ | 3.4 c  | 33.63 $\pm$ | 2.7 e  | 45.52 $\pm$ | 4.8 c  | 34.93 $\pm$ | 3.8 b |
| Claudio   | 53.29 $\pm$ | 3.3 a  | 31.64 $\pm$ | 4.2 e  | 51.15 $\pm$ | 4.4 bc | 40.96 $\pm$ | 4.9 b |
| Colosseo  | 44.81 $\pm$ | 2.5 b  | 73.21 $\pm$ | 4.6 a  | 69.89 $\pm$ | 3.9 a  | 53.57 $\pm$ | 2.3 a |
| Kofa      | 8.74 $\pm$  | 3.8 e  | 43.10 $\pm$ | 4.8 d  | 64.54 $\pm$ | 4.8 a  | 24.48 $\pm$ | 4.7 c |
| Meridiano | 39.13 $\pm$ | 4.7 bc | 58.90 $\pm$ | 3.4 c  | 48.31 $\pm$ | 4.4 c  | 37.13 $\pm$ | 3.6 b |
| Neodur    | 24.79 $\pm$ | 3.4 d  | 64.33 $\pm$ | 3.2 bc | 55.97 $\pm$ | 3.1 b  | 25.39 $\pm$ | 5.2 c |
| Ofanto    | 25.63 $\pm$ | 1.8 d  | 61.23 $\pm$ | 3.5 bc | 49.21 $\pm$ | 2.7 bc | 40.02 $\pm$ | 4.4 b |
| Simeto    | 42.92 $\pm$ | 3.3 b  | 34.12 $\pm$ | 2.8 e  | 51.64 $\pm$ | 4.7 bc | 37.28 $\pm$ | 4.2 b |
| Svevo     | 48.59 $\pm$ | 1.9 b  | 34.50 $\pm$ | 3.3 e  | 48.34 $\pm$ | 4.6 c  | 46.98 $\pm$ | 2.9 b |

**Table S3.** Two-way ANOVA REPORT for Proline measured in ten wheat cultivars in response to different treatments.

| Source of variation | Sum of square | df  | Mean Square | F      | p-value  |     |
|---------------------|---------------|-----|-------------|--------|----------|-----|
| Cultivar            | 85.2          | 9   | 9.5         | 514.2  | 6.45E-67 | *** |
| Treatment           | 194.1         | 3   | 64.7        | 3513.3 | 8.61E-85 | *** |
| Interaction         | 57.7          | 27  | 2.1         | 116.0  | 2.17E-53 | *** |
| Res. error          | 1.5           | 80  | 0           |        |          |     |
| Total               | 338.5         | 119 | 2.8         |        |          |     |

**Table S4.** Free proline content measured in ten *T. durum* cvs in control conditions (CONT) and in response to drought stress (D), to heat shock (H40), to mixed stress (MIXED). The results are shown as the mean and standard deviation of the three replicates, expressed in  $\mu\text{ mol g FW}^{-1}$ . In each column, values marked with different letters indicate significant difference among cultivars at  $p < 0.05$  (ANOVA with post-hoc Bonferroni-Holm test).

|                  | Proline content ( $\mu\text{ mol g FW}^{-1}$ ) |        |            |         |            |         |            |         |
|------------------|------------------------------------------------|--------|------------|---------|------------|---------|------------|---------|
|                  | CONT                                           |        | D          |         | H40        |         | MIXED      |         |
|                  | Mean                                           | SD     | Mean       | SD      | Mean       | SD      | Mean       | SD      |
| <b>Ardente</b>   | 0.78 $\pm$                                     | 0.08 b | 1.69 $\pm$ | 0.08 cd | 5.16 $\pm$ | 0.01 b  | 2.12 $\pm$ | 0.08 d  |
| <b>Cappelli</b>  | 0.67 $\pm$                                     | 0.06 b | 1.96 $\pm$ | 0.06 cd | 3.13 $\pm$ | 0.06 d  | 1.97 $\pm$ | 0.08 d  |
| <b>Claudio</b>   | 0.81 $\pm$                                     | 0.10 b | 3.00 $\pm$ | 0.02 a  | 3.44 $\pm$ | 0.16 cd | 2.54 $\pm$ | 0.33 cd |
| <b>Colosseo</b>  | 1.97 $\pm$                                     | 0.31 a | 2.53 $\pm$ | 0.12 c  | 5.93 $\pm$ | 0.23 b  | 4.41 $\pm$ | 0.45 b  |
| <b>Kofa</b>      | 0.67 $\pm$                                     | 0.06 b | 2.49 $\pm$ | 0.06 c  | 3.66 $\pm$ | 0.06 c  | 3.07 $\pm$ | 0.05 c  |
| <b>Meridiano</b> | 0.52 $\pm$                                     | 0.05 b | 2.00 $\pm$ | 0.06 d  | 3.56 $\pm$ | 0.17 cd | 2.54 $\pm$ | 0.02 d  |
| <b>Neodur</b>    | 1.90 $\pm$                                     | 0.01 a | 2.98 $\pm$ | 0.02 b  | 5.39 $\pm$ | 0.01 b  | 4.23 $\pm$ | 0.05 b  |
| <b>Ofanto</b>    | 0.52 $\pm$                                     | 0.05 b | 2.53 $\pm$ | 0.06 c  | 4.09 $\pm$ | 0.17 c  | 3.06 $\pm$ | 0.02 bc |
| <b>Simeto</b>    | 0.90 $\pm$                                     | 0.03 b | 3.12 $\pm$ | 0.04 a  | 8.08 $\pm$ | 0.05 a  | 6.57 $\pm$ | 0.05 a  |
| <b>Svevo</b>     | 1.24 $\pm$                                     | 0.08 b | 2.16 $\pm$ | 0.08 c  | 2.45 $\pm$ | 0.17 d  | 2.48 $\pm$ | 0.22 d  |

**Table S5.** Primers set used for qRT-PCR. Target genes and their relative GenBank IDs are reported.

| Primer Sequence (5' - 3')                             | Target Gene (GeneBank ID)     |
|-------------------------------------------------------|-------------------------------|
| For-CAATGCCGGATGGACTG<br>Rev-GTGAAGGCCGGGCTGGA        | <i>TdHSP16.9</i> (AM709754.1) |
| For-CTCGGGTCCGGCGACA<br>Rev-CTCCGCCGTGTGCCG           | <i>TdHSP17.6</i> (AJ971359.1) |
| For-AAGTACAACCGCCGCA<br>Rev-GAAGACGTCCTTGCGCT         | <i>TdHSP23.5</i> (AM709764)   |
| For-AGCACAAGAAGGAGGCC<br>Rev-TCACTGGACCTGCACGT        | <i>TdHSP26.5</i> (AJ971373.1) |
| For-GCTGATTGGCAGGAGGTTCT<br>Rev-TTGTGCTTGCGCTTGAATC   | <i>TaHSP70</i> (AF005993.1)   |
| For-CGAGAACTCCACGGTGTACATC<br>Rev-TGCTTGTCGACGCCATAGG | <i>TdHSP101C</i> (AJ970536.2) |
| For-AGCCAGTTCCACTCCAACA<br>Rev-GAGGATGCTGCCAACAACTTC  | <i>TaTub</i> (U76558)         |
